# Supplementary material
Source: PubMed Central journal article supplement (PMC8183615)
Supplement: NIHMS1703667-supplement-Supplement.pdf [file NIHMS1703667-supplement-Supplement.pdf]

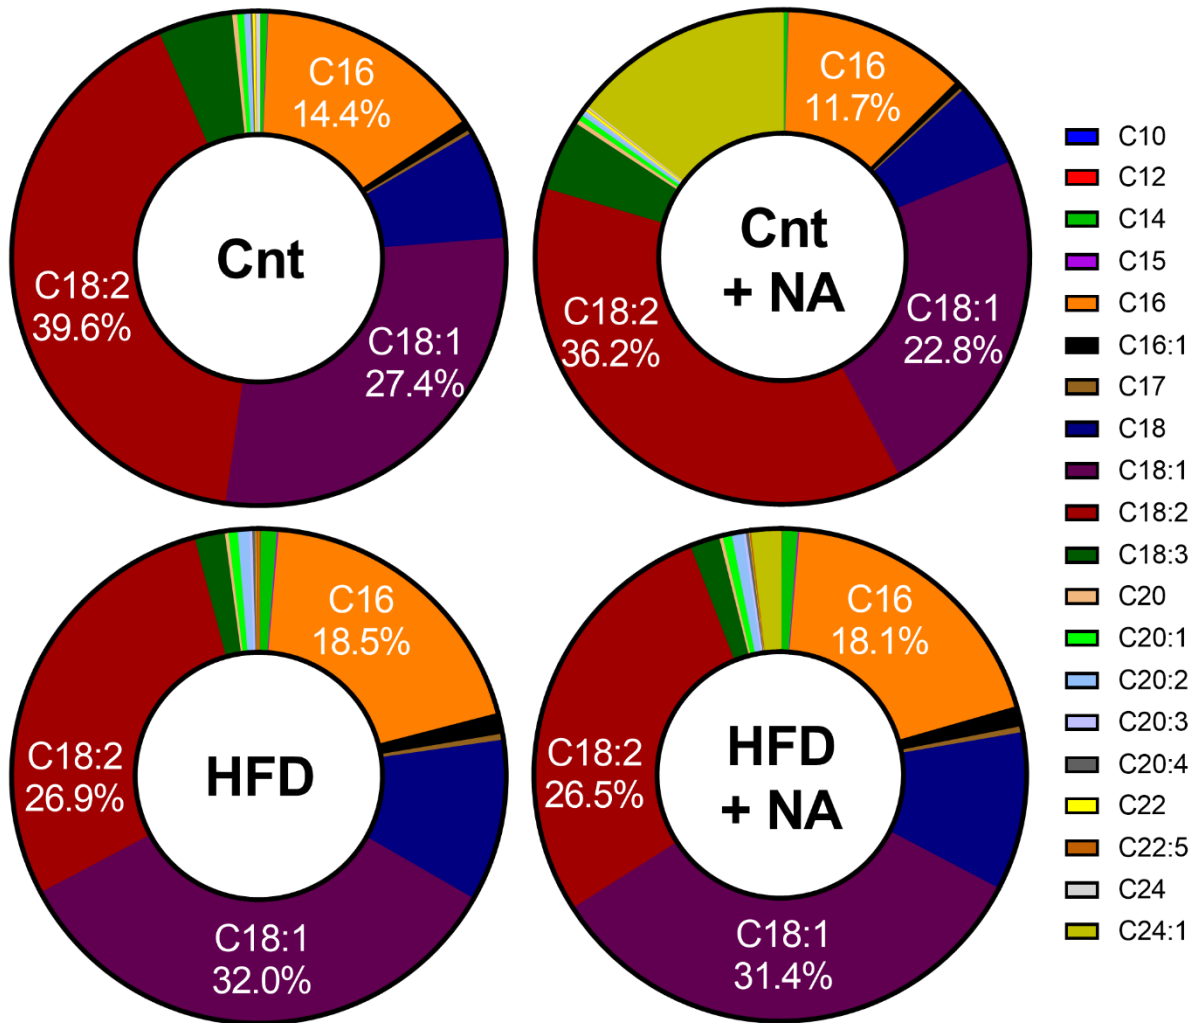

**Supplemental Figure 1: Fatty acid composition of diets.** The fatty acid percentages of the Cnt, Cnt+NA, HFD, and HFD+NA utilized in this study.
